# Supplementary material for: Spatial Stereoresolution for Depth Corrugations May Be Set in Primary Visual Cortex
Source: PLOS journal article supplement (doi:10.1371/journal.pcbi.1002142), 2011-08-18
Supplement: S2 (10.1371/journal.pcbi.1002142.s002) [file journal.pcbi.1002142.s002]

301 Moved Permanently

# Moved Permanently

The document has moved here.

---

Apache Server at www.ploscompbiol.org Port 80
